# Supplementary material
Source: HighWire-hosted journal article supplement (https://fg.bmj.com/highwire/filestream/143644/field_highwire_adjunct_files/0/flgastro-2021-101994supp001_data_supplement.pdf)
Supplement: flgastro-2021-101994supp001_data_supplement.pdf [file flgastro-2021-101994supp001_data_supplement.pdf]

**SUPPLEMENTARY SECTION**

**Supplementary Figure 1: Horizontal bar-chart of participants region of work**

**Supplementary Figure 2: Vertical bar-chart of participants experience in their speciality**

**Supplementary Figure 3: Diverging stacked bar chart of the most significant benefits that AI might eventually bring to gastroenterology**

**Supplementary Figure 4: Participants response to the priorities of AI research**
